# Supplementary figures and images for: Canonical Wnt signaling is involved in switching from cell proliferation to myogenic differentiation of mouse myoblast cells
Source: Springer Nature journal article supplement (doi:10.1186/1750-2187-6-12), 2011-10-05

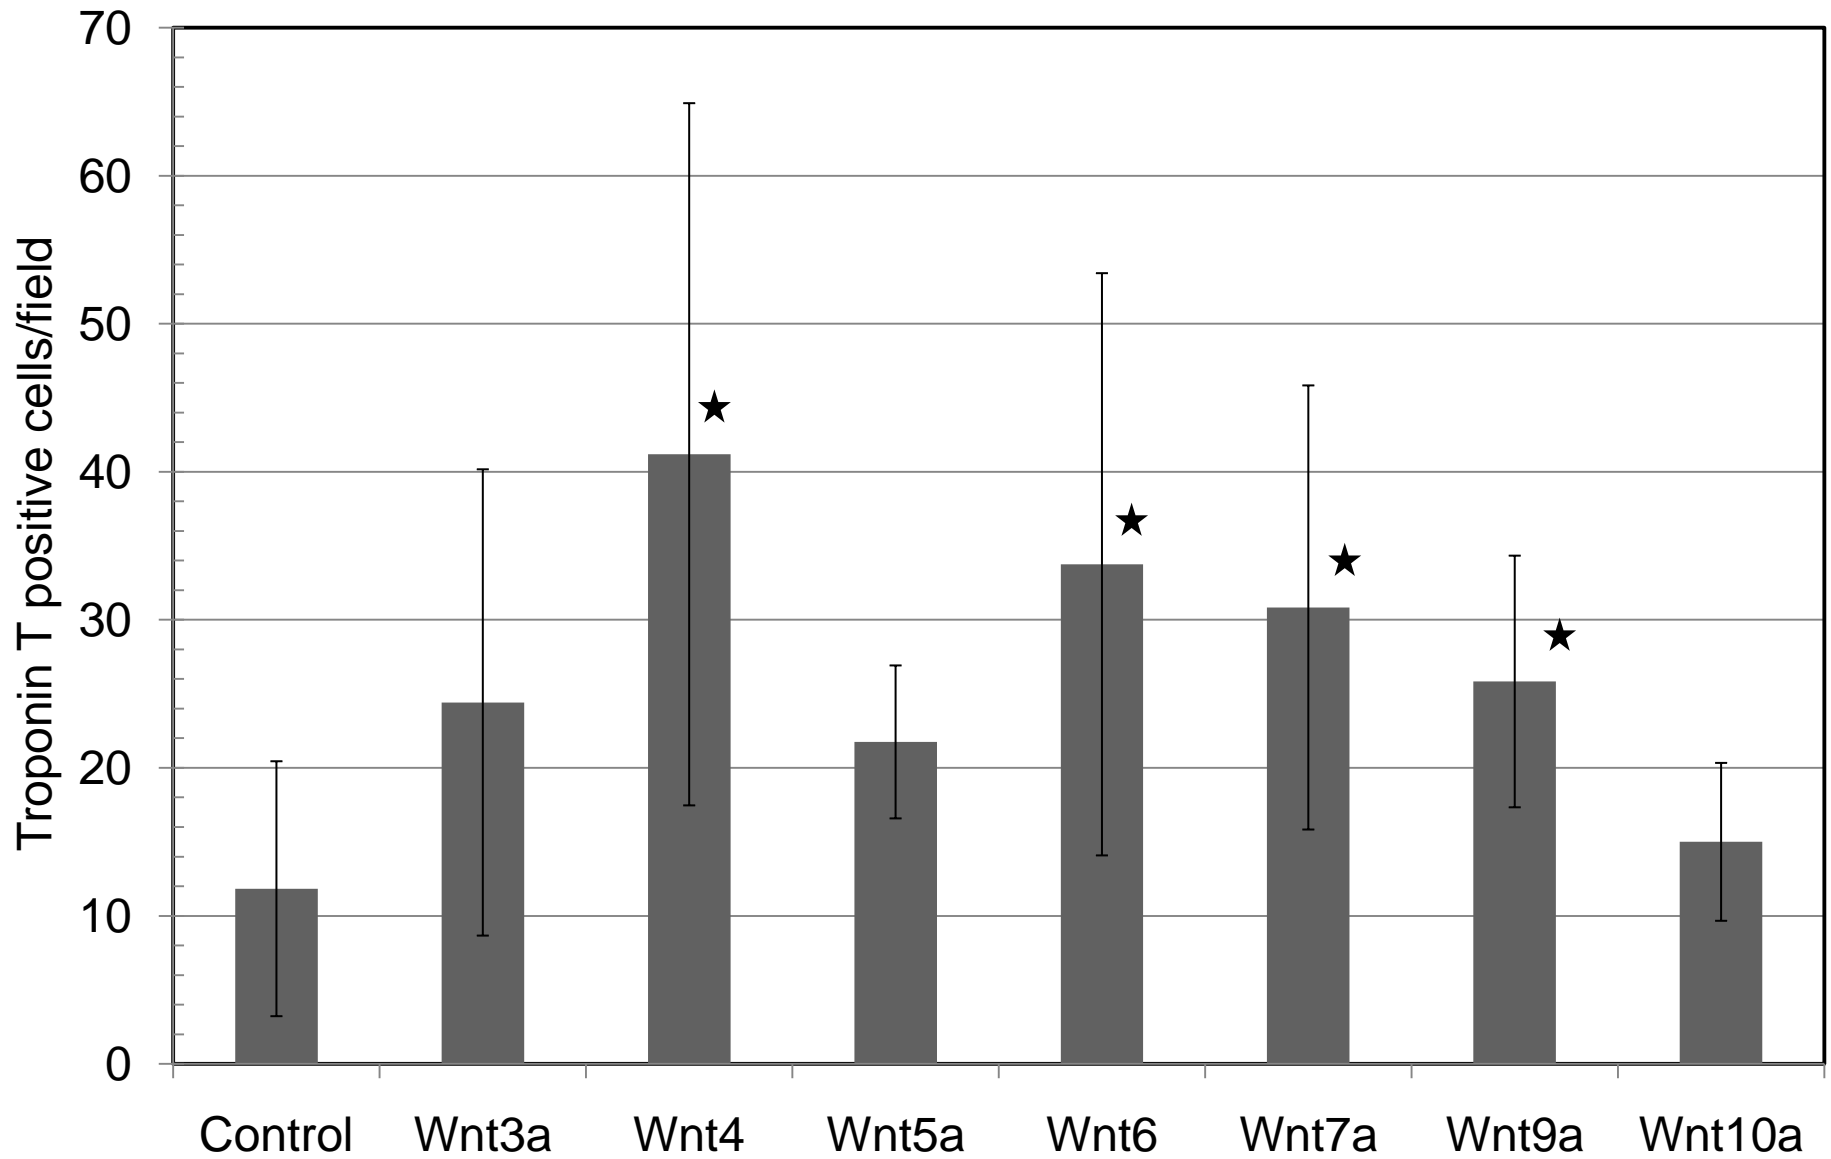

Supplement: Additional file 4 [file 1750-2187-6-12-s4.pdf]
